# Supplementary material for: A Design Approach to Reducing Stress and Distortion Caused by Adhesive Assembly in Micromachined Deformable Mirrors
Source: MDPI journal article supplement (doi:10.3390/mi14040740), 2023-03-27
Supplement: s1 [file s1]

## Supporting Information

### A Design Approach to Reducing Stress and Distortion Caused by Adhesive Assembly in Micromachined Deformable Mirrors

Wenkuan Man <sup>1,2</sup> and Thomas G. Bifano <sup>1,2,3,\*</sup>

<sup>1</sup> Division of Materials Science and Engineering, Boston University,  
Boston, MA 02215, USA

<sup>2</sup> Mechanical Engineering Department, Boston University, Boston, MA 02215, USA

<sup>3</sup> Photonics Center, Boston University, Boston, MA 02215, USA

\* Authors to whom the correspondence should be addressed: [tg@bu.edu](mailto:tg@bu.edu)

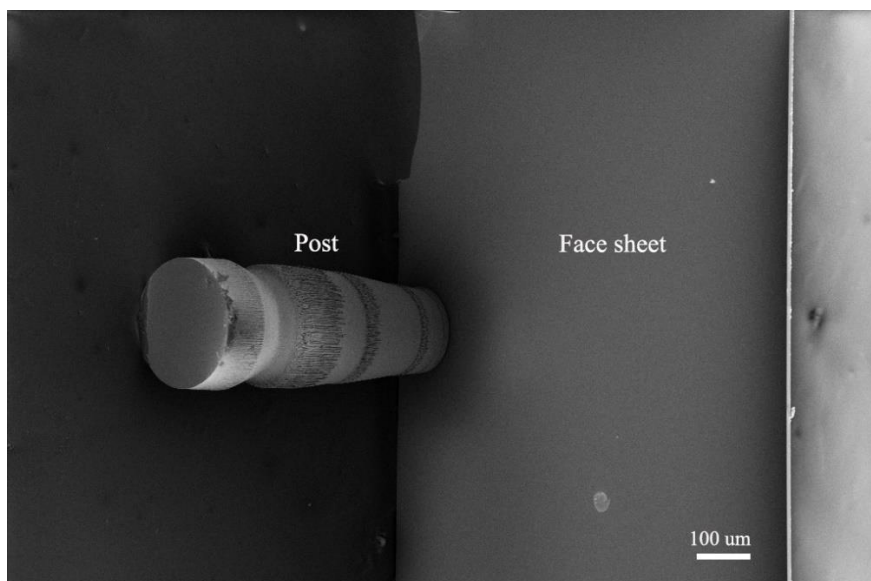

**Figure S1.** SEM image of single etched silicon post integrated on face sheet.

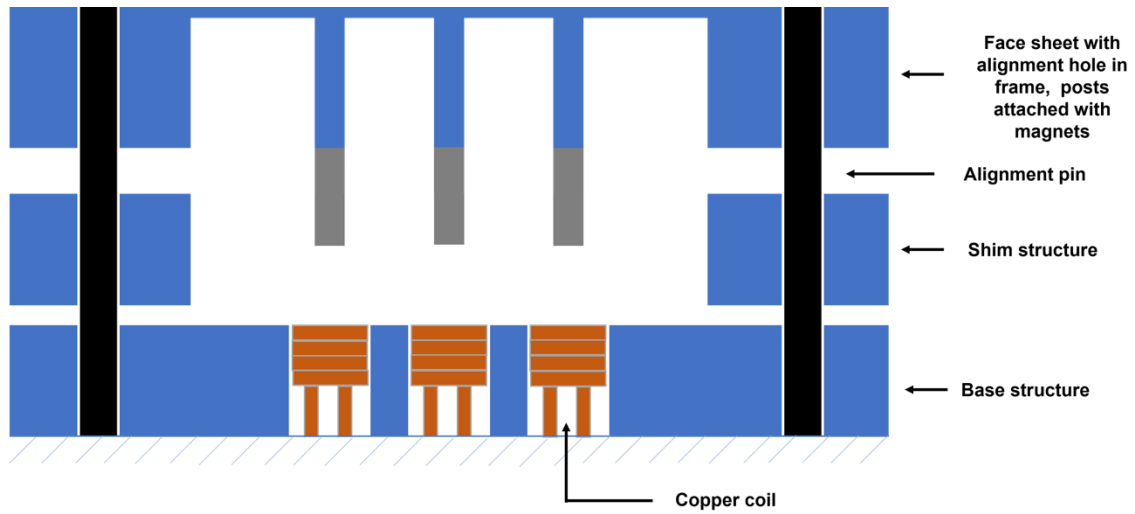

**Figure S2.** Cross-sectional schematic of the assembly setup for electromagnetic actuation tests. The setup includes three main components layered from top to bottom: A circular face sheet fixed at its edges by a rigid frame, supporting an array of posts (three shown) that have magnets adhesively bonded to their distal ends; a shim material to control the gap between magnets and actuation coils; and a base structure holding the individually addressable copper coils. These three structures are aligned using several pins that connect alignment holes integrated into each layer.

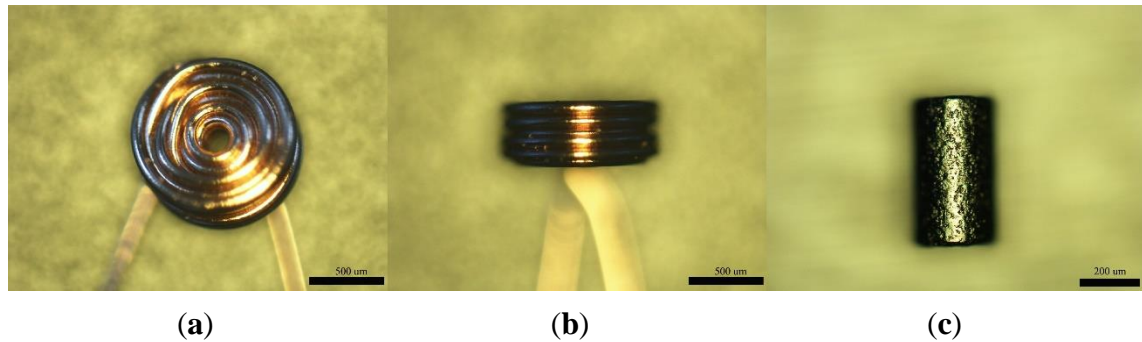

**Figure S3.** Microscope photographs of copper coil and magnet used for electromagnetic actuation tests. (a) Top view of copper coil; (b) Side view of copper coil; (c) side view of magnet.
